# Supplementary material for: Fluorometric probing of the lipase level as acute pancreatitis biomarkers based on interfacially controlled aggregation-induced emission (AIE)
Source: PubMed Central journal article supplement — Chem Sci. 2017 Jun 23;8(9):6188–95. doi: 10.1039/c7sc02189e (PMC5628346; doi:10.1039/c7sc02189e), 2017-06-23
Supplement: SC-008-C7SC02189E-s001.pdf [file SC-008-C7SC02189E-s001.pdf]

## Supplementary information

# Fluorometric probing lipase levels as acute pancreatitis biomarker based on interfacial controlled aggregation-induced emission (AIE)

*Jie Shi,<sup>a</sup> Qianchun Deng,<sup>a</sup> Chuyun Wan,<sup>a</sup> Mingming Zheng,<sup>a</sup> Fenghong Huang<sup>\*a</sup> and  
Bo Tang<sup>\*b</sup>*

<sup>a</sup>Hubei Key Laboratory of Lipid Chemistry and Nutrition, Oil Crops and Lipids  
Process Technology National & Local Joint Engineering Laboratory, Key Laboratory  
of Oilseeds Processing, Ministry of Agriculture, Oil Crops Research Institute, Chinese  
Academy of Agricultural Sciences, Wuhan 430062, China

<sup>b</sup>College of Chemistry, Chemical Engineering and Materials Science, Collaborative  
Innovation Center of Functionalized Probes for Chemical Imaging in Universities of  
Shandong, Key Laboratory of Molecular and Nano Probes, Ministry of Education,  
Shandong Normal University, Jinan 250014, China

\* Corresponding author. Phone: 86-27-86827874; E-mail: shij@whu.edu.cn

\* Corresponding author. Phone: 86-531-86182545; E-mail: tangb@sdu.edu.cn

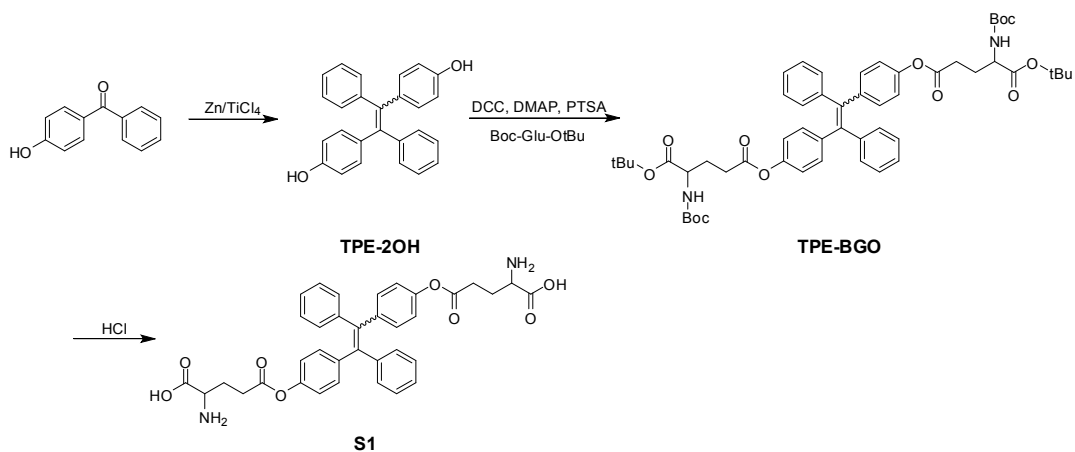

**Scheme S1.** Synthetic route for the probe S1.

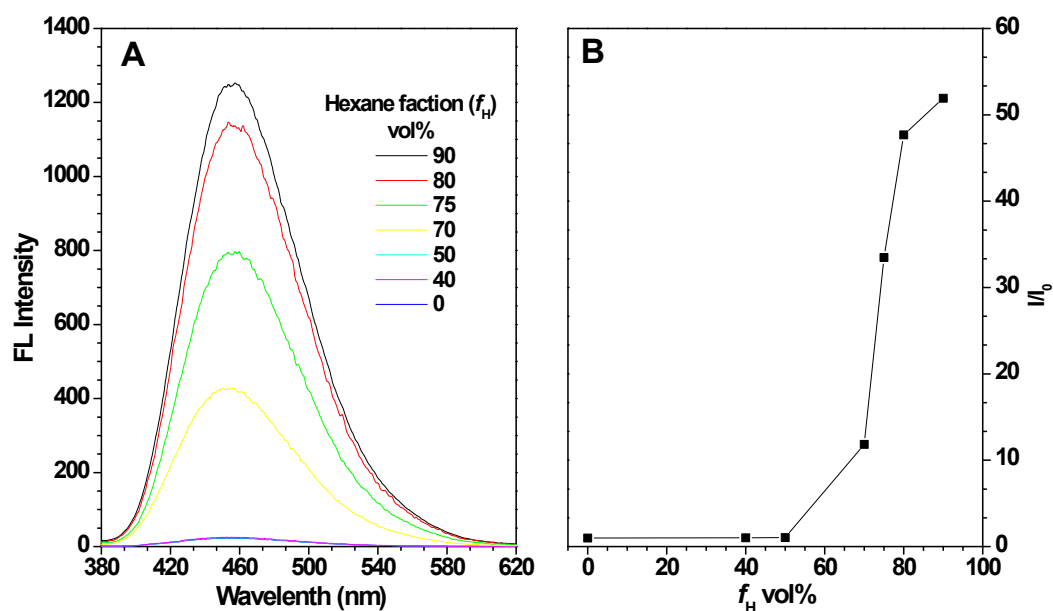

**Fig. S1** (A) fluorescence emission spectra of **TPE-2OH** (10  $\mu\text{M}$ ) in THF-hexane mixtures with different fractions of hexane ( $f_H$ ). (B) Plot of  $I/I_0$  at 453 nm versus  $f_H$ , where  $I_0$  is the fluorescence intensity in pure THF solution. Excitation wavelength: 360 nm.

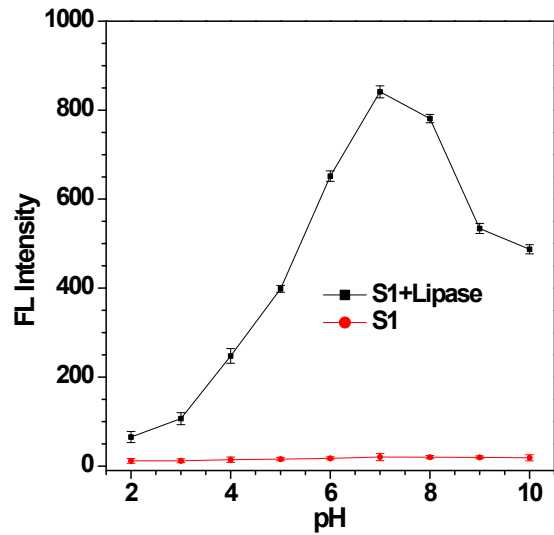

**Fig. S2** Fluorescent emission spectra of S1 and S1 + lipase at different pH value in PBS buffer, excited at 360 nm.

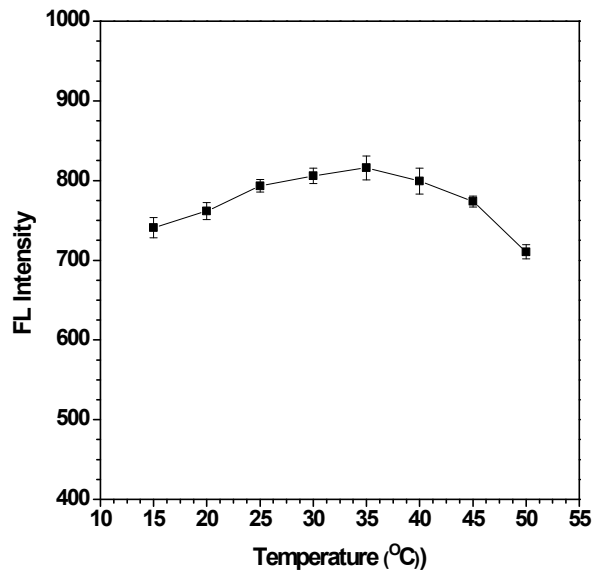

**Fig. S3** Fluorescent emission spectra of S1 (10 μM) after incubation with lipase at different temperatures in PBS buffer, excited at 360 nm.

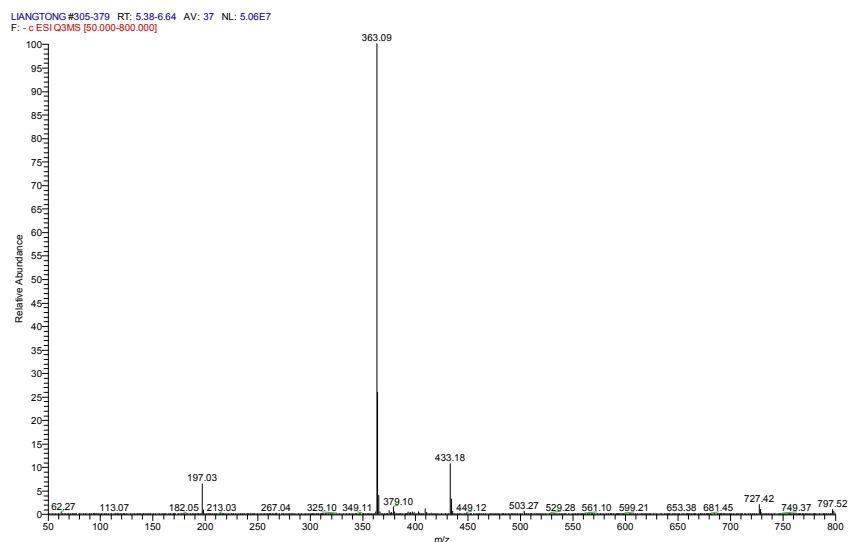

**Fig. S4** Mass spectrum of the enzymatic reaction product. The probe (10  $\mu\text{M}$ ) with lipase (80 U/L) at 37  $^{\circ}\text{C}$  in PBS-buffered water (pH 7.4, 0.1 M) was incubated for 20 min. MS (ESI): the enzymatic reaction product  $m/z$  363.09 [M-H]<sup>-</sup>. It is indicated that the product of the enzymatic reaction has the same molecular structure as **TPE-2OH**.

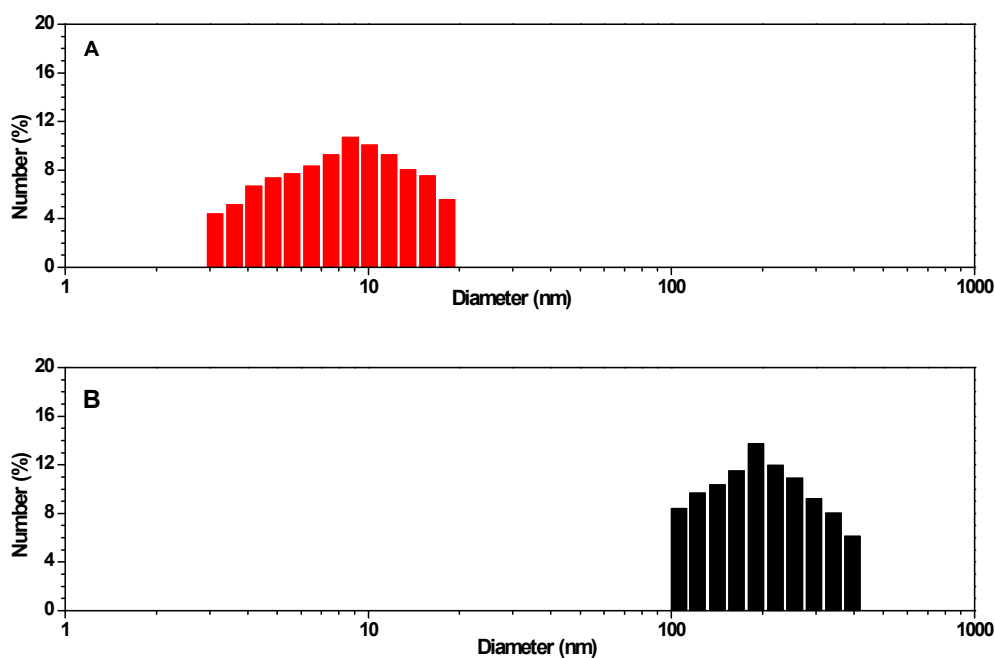

**Fig. S5** Dynamic light scattering (DLS) results for the solution of probe **S1** in the absence and presence of lipase: (a) probe **S1** (10  $\mu\text{M}$ ) in hexane solution; (b) probe **S1** (10  $\mu\text{M}$ ) in hexane solution after incubated with lipase (80 U/L) for 20 min.

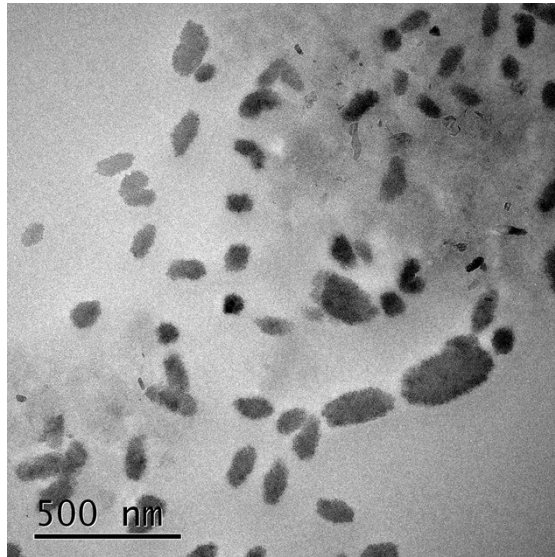

**Fig. S6** TEM image of the enzymatic reaction product in hexane after incubated with lipase (80 U/L) for 20 min.

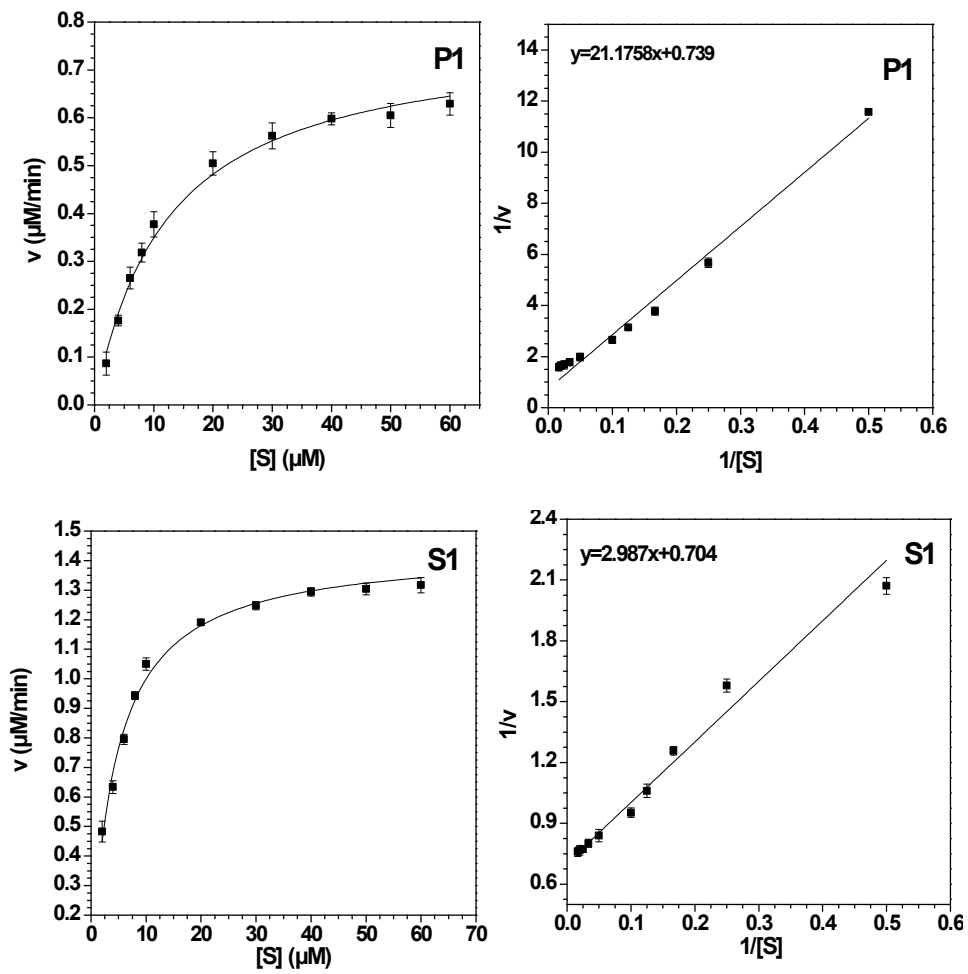

**Fig. S7** Substrate dependence of the initial degradation velocities for Lipase. Initial

velocities were plotted against the substrate concentrations and fit to the Michaelis-Menten model.

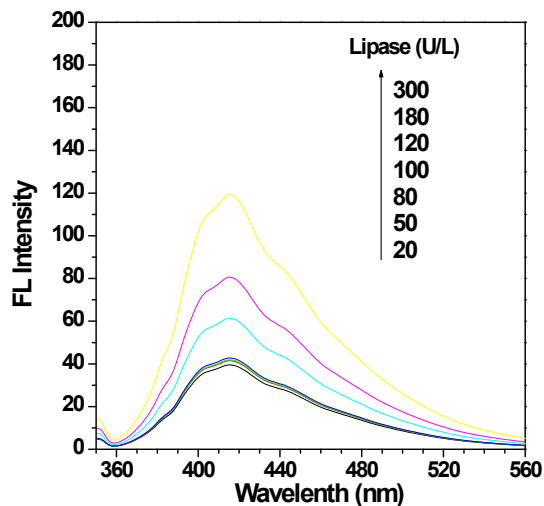

**Fig. S8** The fluorescence emission spectra of probe P1 (10 μM) after incubation with different concentrations of lipase-buffer (0.1 M PBS) solution at 25 °C.

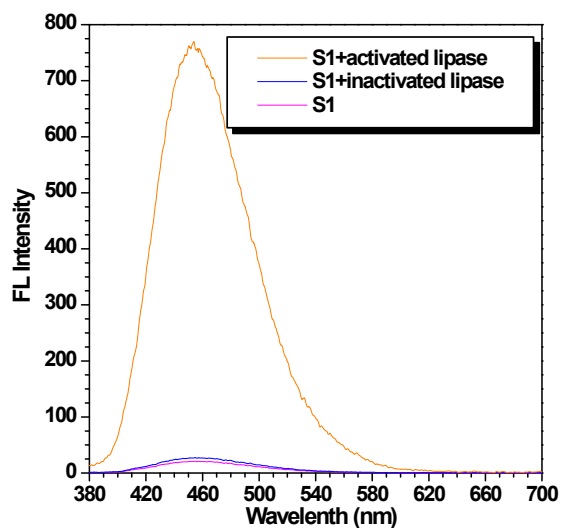

**Fig. S9** Fluorescence spectra of the probe S1, probe S1/activated lipase and probe S1/inactivated lipase. Concentration: probe S1 (10 μM); activated lipase (80 U/L); inactivated lipase (80 U/L). Excitation wavelength: 360 nm.

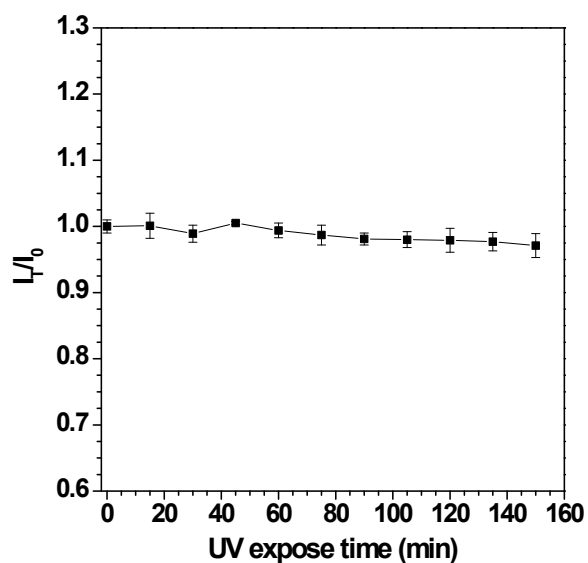

**Fig. S10** Photostability of the reaction product aggregates.  $I_t/I_0$  is the fluorescence intensity ratio at 453 nm, excited at 254 and 365 nm after T-minute light irradiation and before light irradiation. Excitation wavelength: 360 nm.

**Table S1** Use of **S1** as substrate in pH-stat method for detecting the hydrolytic activity of commercial lipases. All assays were performed with 0.01 g lipase at 37 °C and pH 7.4 for 20 min.

| Lipase | PCL | CALB | RFL | ANL | CRL | PPL |
|--------|-----|------|-----|-----|-----|-----|
|--------|-----|------|-----|-----|-----|-----|

|                         |       |       |       |        |       |        |
|-------------------------|-------|-------|-------|--------|-------|--------|
| $V_{\text{NaOH}}$ (mL)  | 1.61  | 3.64  | 2.39  | 4.59   | 2.99  | 8.31   |
| $V_{\text{error}}$ (mL) | 0.117 | 0.365 | 0.209 | 0.142  | 0.197 | 0.322  |
| Activity (U/g)          | 39.69 | 89.48 | 58.91 | 113.02 | 73.54 | 204.53 |

| Method           | Sample | Lipase amount ( U/L) |        | Recovery (%) | SD (%) |
|------------------|--------|----------------------|--------|--------------|--------|
|                  |        | Added                | Found  |              |        |
| Lipase Assay Kit | 1      | 10.00                | 9.75   | 97.50        | 4.3    |
|                  | 2      | 20.00                | 20.04  | 100.20       | 5.1    |
|                  | 3      | 30.00                | 29.63  | 98.77        | 4.9    |
|                  | 4      | 40.00                | 39.13  | 97.83        | 3.6    |
|                  | 5      | 50.00                | 48.71  | 97.42        | 3.4    |
|                  | 6      | 60.00                | 60.09  | 100.15       | 3.5    |
|                  | 7      | 70.00                | 69.38  | 99.11        | 2.7    |
|                  | 8      | 80.00                | 81.24  | 101.55       | 3.3    |
|                  | 9      | 90.00                | 88.97  | 98.86        | 4.1    |
|                  | 10     | 100.00               | 102.44 | 102.44       | 1.8    |
| Probe S1         | 1      | 10.00                | 9.89   | 98.90        | 2.9    |
|                  | 2      | 20.00                | 19.31  | 96.55        | 4.8    |
|                  | 3      | 30.00                | 28.79  | 95.97        | 2.2    |
|                  | 4      | 40.00                | 39.22  | 98.05        | 1.9    |
|                  | 5      | 50.00                | 51.25  | 102.5        | 3.7    |
|                  | 6      | 60.00                | 59.67  | 99.45        | 3.5    |
|                  | 7      | 70.00                | 68.54  | 97.91        | 4.2    |
|                  | 8      | 80.00                | 81.69  | 102.11       | 4.6    |
|                  | 9      | 90.00                | 87.71  | 97.46        | 3.4    |
|                  | 10     | 100.00               | 98.59  | 98.59        | 2.5    |

**Table S2.** Comparison of lipase levels detection by using lipase assay kit and probe S1. Standard recovery experiments were performed by adding a known quantity of lipase to diluted human serum samples of healthy people.
